# Supplementary material for: Ethyl P-Methoxycinnamate: An Active Anti-Metastasis Agent and Chemosensitizer Targeting NFκB from Kaempferia galanga for Melanoma Cells
Source: MDPI journal article supplement (doi:10.3390/life12030337), 2022-02-24

# Ethyl P-Methoxycinnamate: An Active Anti-Metastasis Agent and Chemosensitizer Targeting NFkB from *Kaempferia galanga* for Melanoma Cells

Subehan Lallo <sup>1,\*</sup>, Besse Hardianti <sup>2,3</sup>, Sartini Sartini <sup>1</sup>, Ismail Ismail <sup>1</sup>, Dewi Laela <sup>1</sup> and Yoshihiro Hayakawa <sup>3,\*</sup>

- 1 Faculty of Pharmacy, Hasanuddin University, Makassar 90245, Indonesia; (sardj@farmasi.unhas.ac.id); (is-mail@unhas.ac.id); (dewiprimayanti@unhas.ac.id)
  - 2 Sekolah Tinggi Ilmu Farmasi Makassar, Makassar, Indonesia; bessehardianti@stifa.ac.id
  - 3 Institute of Natural Medicine, University of Toyama, Toyama, Japan
- \* Correspondence: subehan@unhas.ac.id (S.L.); haya@inm.u-toyama.ac.jp (Y.H.)

## Supplementary Material:

**Figure S1:** Original of western blot image of protein expression in presence and absence of ethyl p-methoxycinnamate.

### A. P38/MAPK

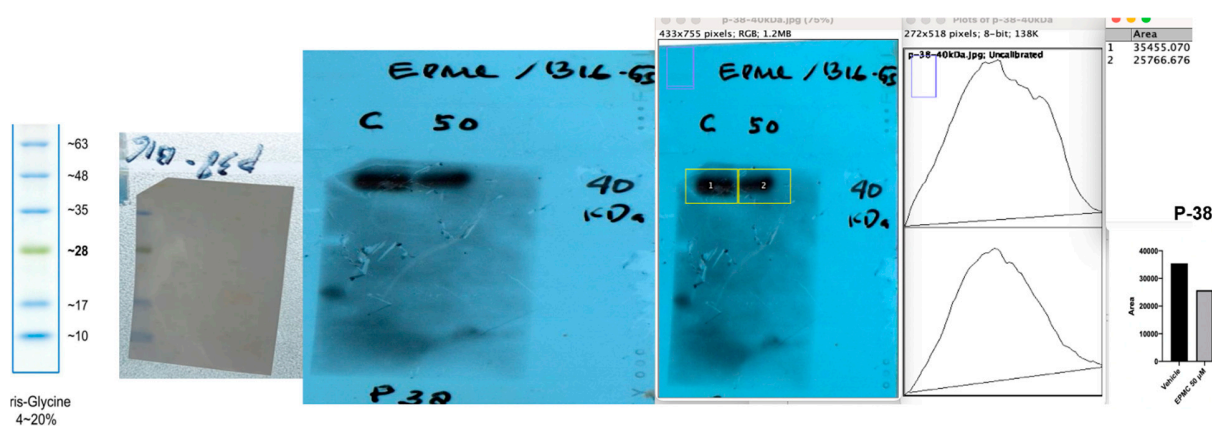

B. p-AKT ser473

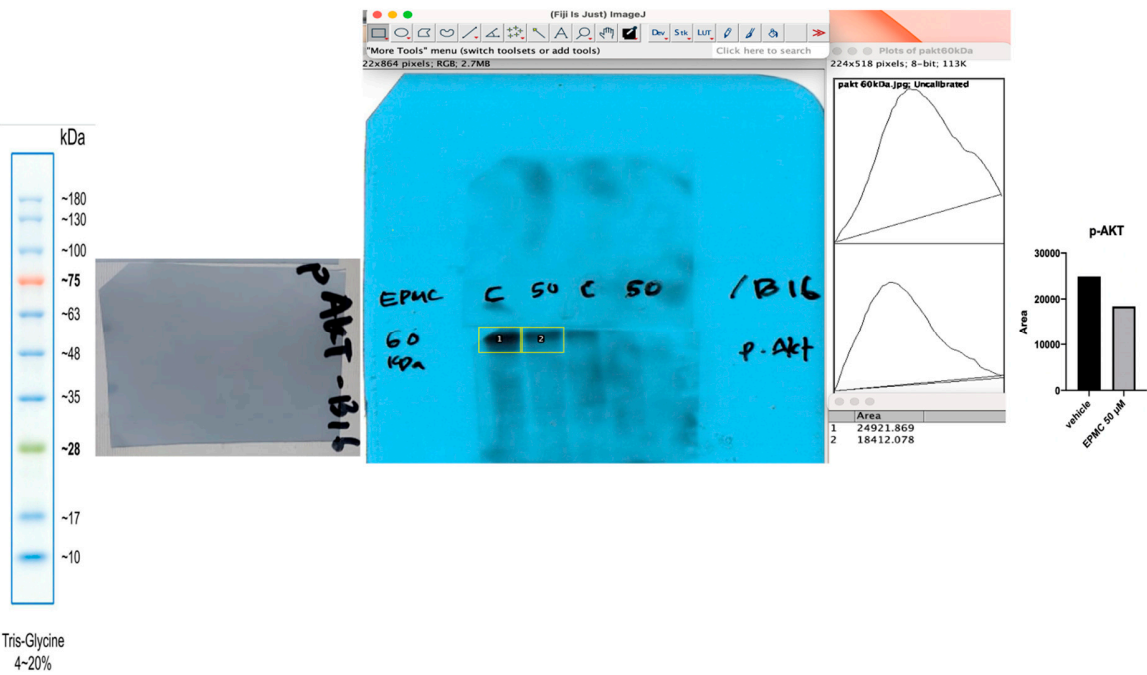

C.  $\beta$ -Actin

B16F10Luc-G5 Cells

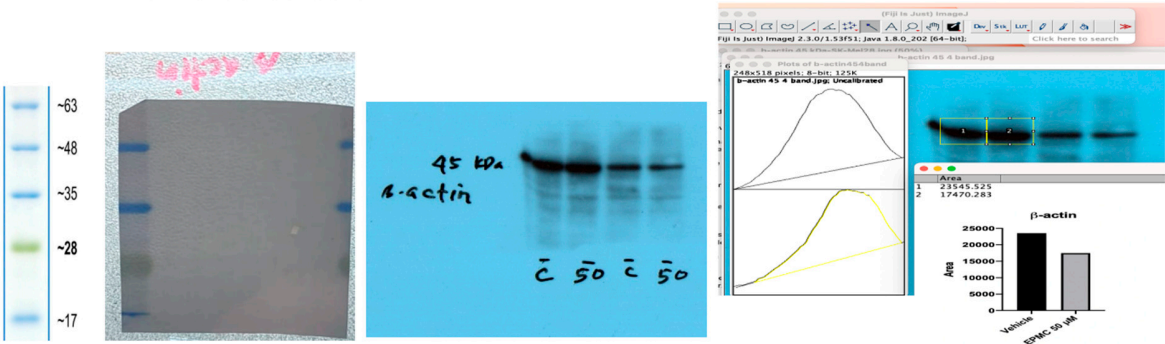

## D. IKK- $\beta$

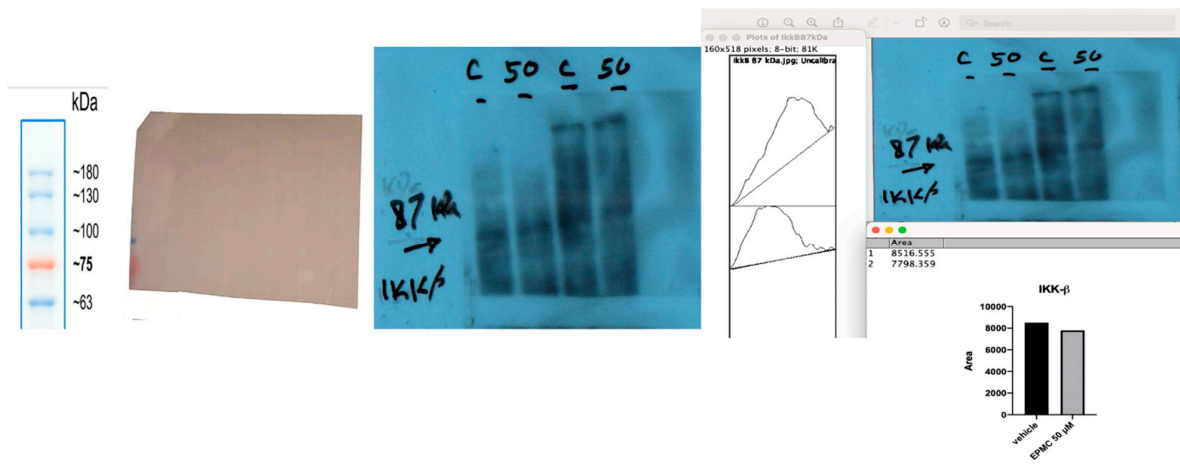

## E. p-IKK $\alpha/\beta$ ser176/180

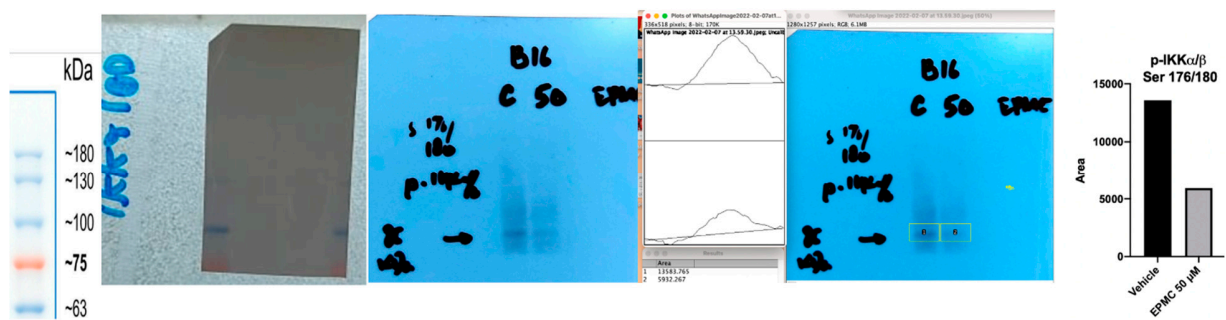

## F. P65

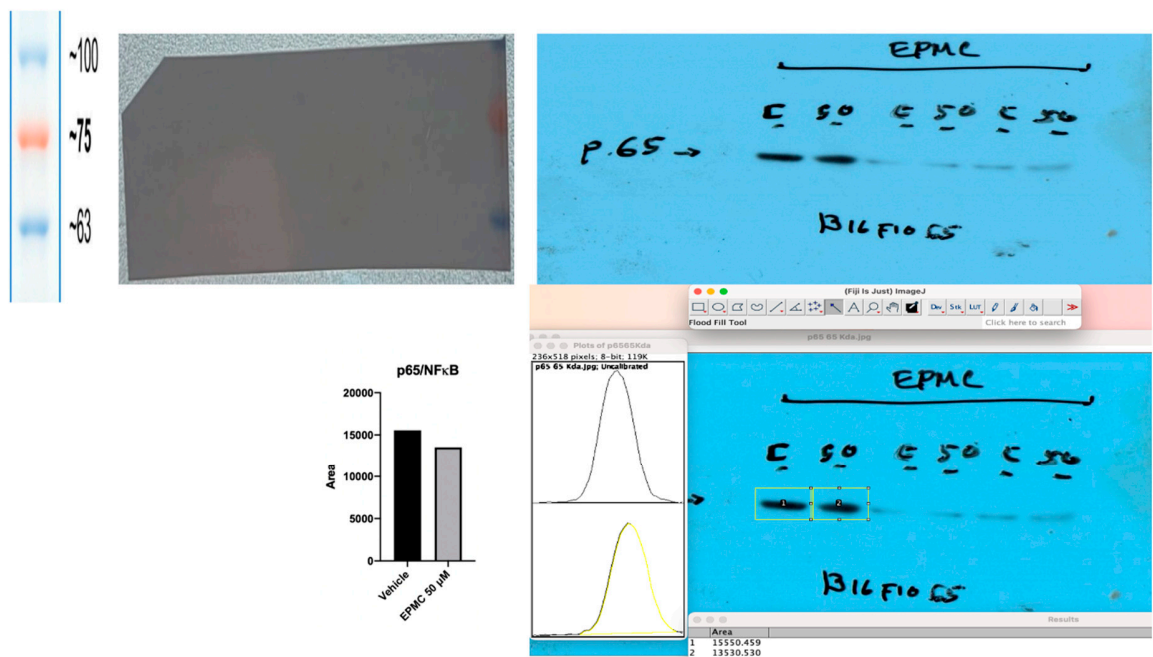

## G. p-p65

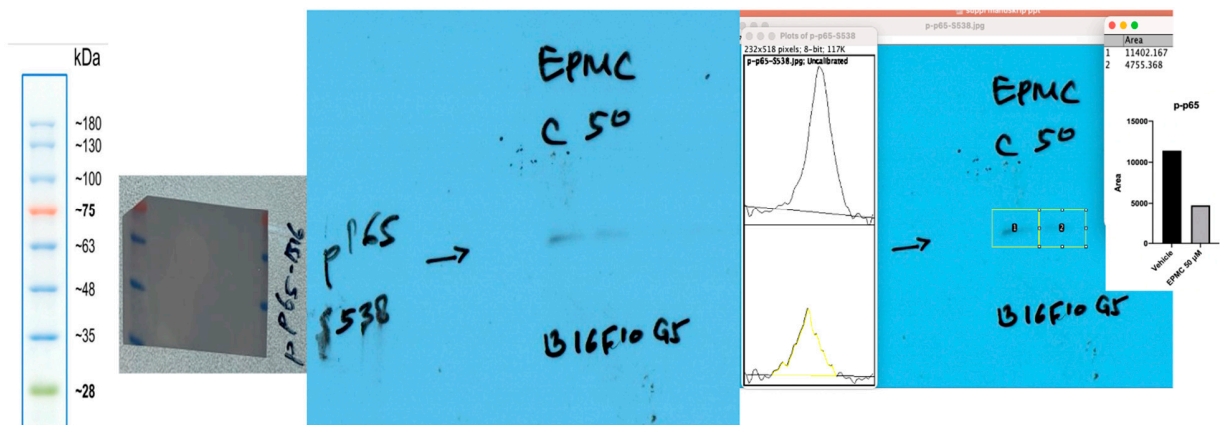



## H. $\beta$ -actin

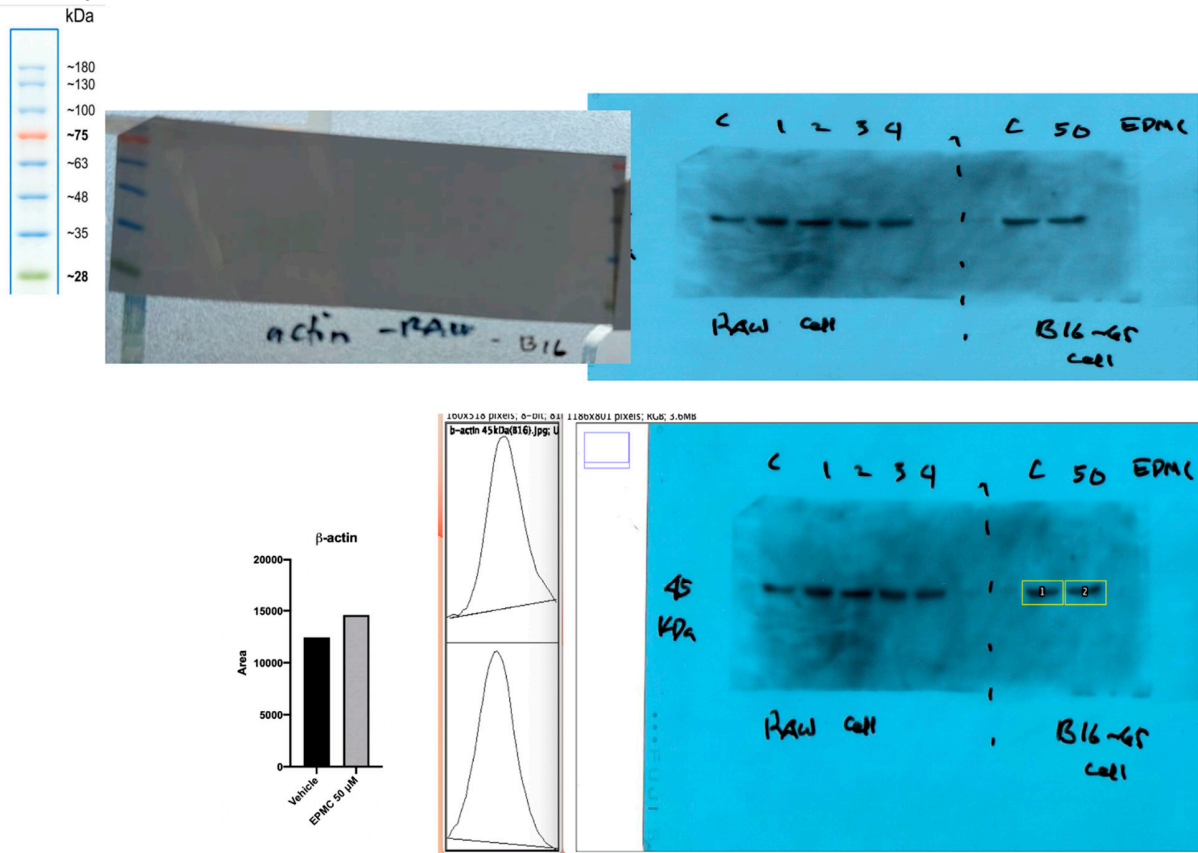

## I. p-H2A.X

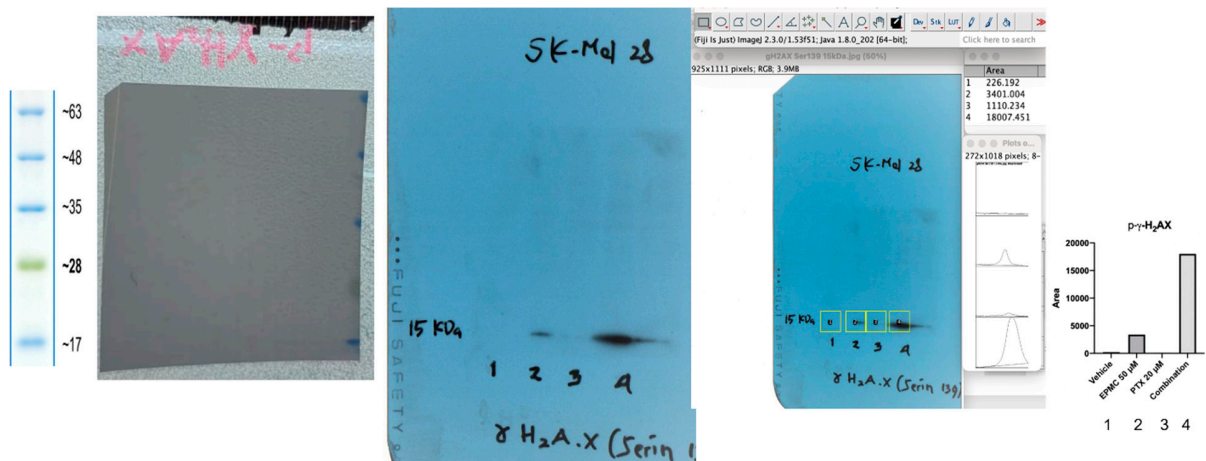

J.  $\beta$ -Actin

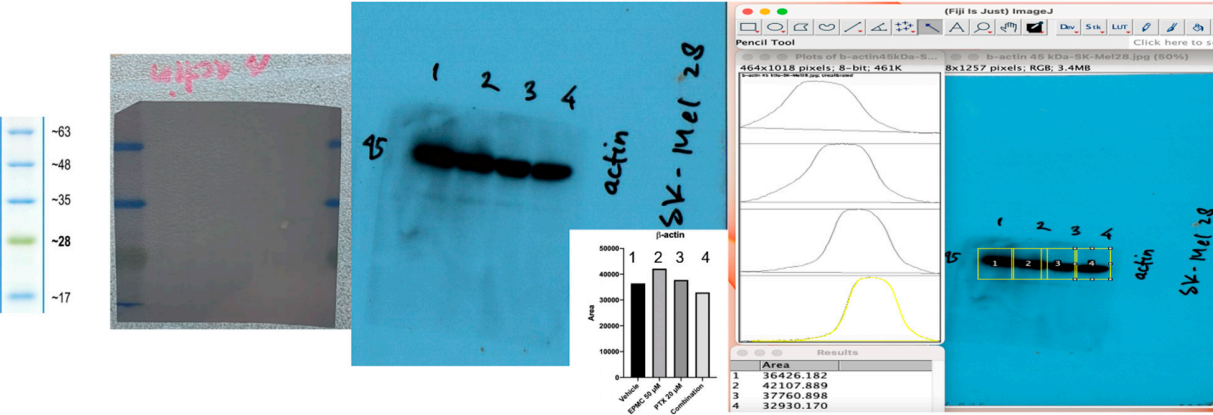

Supplement: s1 [file s1]
